# Supplementary material
Source: HighWire-hosted journal article supplement (https://bmjopen.bmj.com/content/9/9/e028040)
Supplement: inline-supplementary-material-2 [file inline-supplementary-material-2.pdf]

## APPENDIX 2 – SUPPLEMENTARY TABLES

Table A – Summary statistics describing the sample

| Measure                                                   | Total* (n=1,894) | %    | (95% CI)     |
|-----------------------------------------------------------|------------------|------|--------------|
| <b>Awareness of the news about breast screening</b>       |                  |      |              |
| Aware of the main story and both follow-up commentaries   | 250              | 13.2 | 11.7 to 14.8 |
| Aware of the main story and overdiagnosis follow-up       | 188              | 9.9  | 8.6 to 11.3  |
| Aware of the main story and all-cause mortality follow-up | 117              | 6.2  | 5.2 to 7.3   |
| Aware of the main story only                              | 709              | 37.4 | 35.3 to 39.6 |
| Unaware of the story                                      | 630              | 33.3 | 31.2 to 35.4 |
| <b>Recruitment wave</b>                                   |                  |      |              |
| Wave 2: 20-26 <sup>th</sup> June                          | 606              | 32.0 | 29.9 to 34.1 |
| Wave 1: 6-10 <sup>th</sup> June                           | 1,288            | 68.0 | 65.9 to 70.1 |
| <b>Gender</b>                                             |                  |      |              |
| Male                                                      | 801              | 42.3 | 40.1 to 44.5 |
| Female                                                    | 1,093            | 57.7 | 55.5 to 59.9 |
| <b>Ethnicity</b>                                          |                  |      |              |
| White British                                             | 1,555            | 82.4 | 80.7 to 84.1 |
| Other groups                                              | 331              | 17.6 | 15.9 to 19.3 |
| <b>Marital status</b>                                     |                  |      |              |
| Married or living as a married                            | 1,039            | 54.9 | 52.6 to 57.1 |
| Widowed, divorced and separated                           | 382              | 20.2 | 18.4 to 22.0 |
| Single                                                    | 473              | 25.0 | 23.1 to 27.0 |
| <b>Highest level of education</b>                         |                  |      |              |
| Graduate level qualifications and above                   | 530              | 28.2 | 26.2 to 30.3 |
| A-levels and AS levels and equivalents                    | 461              | 24.6 | 22.7 to 26.5 |
| GCSEs and equivalents                                     | 459              | 24.5 | 22.5 to 26.4 |
| Trade apprenticeships or other qualifications             | 93               | 5.0  | 4.0 to 6.0   |
| No formal qualifications                                  | 334              | 17.8 | 16.1 to 19.6 |
| <b>Social grade</b>                                       |                  |      |              |
| Grade A or B                                              | 336              | 17.7 | 16.1 to 19.5 |
| Grade C1                                                  | 539              | 28.5 | 26.5 to 30.5 |
| Grade C2                                                  | 423              | 22.3 | 20.5 to 24.3 |
| Grade D or E                                              | 596              | 31.5 | 29.4 to 33.6 |
| <b>Employment status</b>                                  |                  |      |              |
| Working                                                   | 862              | 45.5 | 43.3 to 47.8 |
| Not working                                               | 1,032            | 54.5 | 52.2 to 56.7 |
| <b>Area type</b>                                          |                  |      |              |
| Urban                                                     | 1,542            | 81.4 | 79.6 to 83.1 |
| Rural                                                     | 352              | 18.6 | 16.9 to 20.4 |
| <b>Personal diagnosis of cancer</b>                       |                  |      |              |
| Yes                                                       | 156              | 8.4  | 7.2 to 9.7   |
| No                                                        | 1,705            | 91.6 | 90.3 to 92.8 |
| <b>Personal experience of breast screening</b>            |                  |      |              |
| Taken part                                                | 441              | 23.7 | 21.8 to 25.7 |
| Invited, never taken part                                 | 56               | 3.0  | 2.3 to 3.9   |
| Not eligible or not invited                               | 1,364            | 73.3 | 71.2 to 75.3 |
| <b>Belief that screening is almost always a good idea</b> |                  |      |              |
| Yes                                                       | 1,737            | 91.7 | 90.4 to 92.9 |
| No or not sure                                            | 157              | 8.3  | 7.1 to 9.6   |
| <b>Awareness of the news about the volcanic eruption</b>  |                  |      |              |
| Yes                                                       | 1,435            | 75.8 | 73.8 to 77.7 |
| No or not sure                                            | 459              | 24.2 | 22.3 to 26.2 |
| <b>Awareness of the news about the local elections</b>    |                  |      |              |
| Yes                                                       | 1,198            | 63.3 | 61.1 to 65.4 |
| No or not sure                                            | 696              | 36.7 | 34.6 to 38.9 |
| <b>General level of trust in participants' GPs</b>        |                  |      |              |
| A lot                                                     | 1,009            | 55.2 | 52.9 to 57.5 |
| Somewhat                                                  | 540              | 29.6 | 27.5 to 31.7 |
| A little                                                  | 219              | 12.0 | 10.6 to 13.5 |
| Not at all                                                | 59               | 3.2  | 2.5 to 4.1   |
| <b>General level of trust in the NHS</b>                  |                  |      |              |

|                                                        |       |      |              |
|--------------------------------------------------------|-------|------|--------------|
| A lot                                                  | 1,016 | 54.2 | 54.9 to 59.5 |
| Somewhat                                               | 619   | 33.0 | 32.7 to 37.1 |
| A little                                               | 184   | 9.8  | 9.0 to 11.8  |
| Not at all                                             | 56    | 3.0  | 2.4 to 4.0   |
| <b>Frequency of worry about breast cancer</b>          |       |      |              |
| Very often                                             | 46    | 4.6  | 3.4 to 6.0   |
| Often                                                  | 55    | 5.4  | 4.2 to 7.0   |
| Sometimes                                              | 216   | 21.4 | 18.9 to 24.0 |
| Occasionally                                           | 302   | 29.9 | 27.1 to 32.8 |
| Never                                                  | 391   | 38.7 | 35.7 to 41.7 |
| <b>Breast screening intentions for next invitation</b> |       |      |              |
| Yes, definitely                                        | 690   | 84.7 | 82.1 to 87.0 |
| Yes, probably                                          | 88    | 10.8 | 8.8 to 13.1  |
| No, probably not                                       | 18    | 2.2  | 1.4 to 3.4   |
| No, definitely not                                     | 19    | 2.3  | 1.5 to 3.5   |

Table B – Full results of the binary logistic regression model testing for variables associated with whether participants responded to questions on the survey module

| Characteristic                                                             | Total<br>(n=2,665)       | Responded vs. Did not respond to the<br>survey questions: n (%) |                                                      | Adjusted OR, 95% CI                                            | p-value                                            |
|----------------------------------------------------------------------------|--------------------------|-----------------------------------------------------------------|------------------------------------------------------|----------------------------------------------------------------|----------------------------------------------------|
|                                                                            |                          | Did not respond<br>(n=779; 29.2%)                               | Responded<br>(n=1,886; 70.8%)                        |                                                                |                                                    |
| <b>Recruitment wave</b>                                                    |                          |                                                                 |                                                      |                                                                |                                                    |
| Wave 2: 20-26 <sup>th</sup> June<br>vs. Wave 1: 6-10 <sup>th</sup> June    | 908<br>1,757             | 303 (33.4)<br>476 (27.1)                                        | 605 (66.6)<br>1,281 (72.9)                           | 0.73, 0.61 to 0.87                                             | <b>&lt;.0005*</b>                                  |
| <b>Gender</b>                                                              |                          |                                                                 |                                                      |                                                                |                                                    |
| Male<br>vs. Female                                                         | 1,270<br>1,395           | 474 (37.3)<br>305 (21.9)                                        | 796 (62.7)<br>1,090 (78.1)                           | 0.46, 0.39 to 0.55                                             | <b>&lt;.0005</b>                                   |
| <b>Ethnicity</b>                                                           |                          |                                                                 |                                                      |                                                                |                                                    |
| White British<br>vs. Other groups                                          | 2,139<br>526             | 584 (27.3)<br>195 (37.1)                                        | 1,555 (72.7)<br>331 (62.9)                           | 1.69, 1.37 to 2.10                                             | <b>&lt;.0005</b>                                   |
| <b>Marital status</b>                                                      |                          |                                                                 |                                                      |                                                                |                                                    |
| Married/Living as a couple<br>vs. Widowed/Divorced/Separated<br>vs. Single | 1,441<br>517<br>707      | 407 (28.2)<br>135 (26.1)<br>237 (33.5)                          | 1,034 (71.8)<br>382 (73.9)<br>470 (66.5)             | 1.48, 1.18 to 1.85<br>1.65, 1.21 to 2.24                       | Overall: <b>.001</b><br><b>.001</b><br><b>.002</b> |
| <b>Social grade</b>                                                        |                          |                                                                 |                                                      |                                                                |                                                    |
| Grade A or B<br>Grade C1<br>Grade C2<br>vs. Grade D or E                   | 450<br>726<br>596<br>893 | 115 (25.6)<br>190 (26.2)<br>174 (29.2)<br>300 (33.6)            | 335 (74.4)<br>536 (73.8)<br>422 (70.8)<br>593 (66.4) | 1.54, 1.18 to 2.02<br>1.44, 1.15 to 1.81<br>1.28, 1.01 to 1.63 | Overall: <b>.003</b><br><b>.002</b><br><b>.045</b> |
| <b>Employment status</b>                                                   |                          |                                                                 |                                                      |                                                                |                                                    |
| Working<br>vs. Not working                                                 | 1,225<br>1,440           | 366 (29.9)<br>413 (28.7)                                        | 859 (70.1)<br>1,027 (71.3)                           | 0.79, 0.65 to 0.97                                             | <b>.026</b>                                        |
| <b>Area type</b>                                                           |                          |                                                                 |                                                      |                                                                |                                                    |
| Urban<br>vs. Rural                                                         | 2,164<br>501             | 629 (29.1)<br>150 (29.9)                                        | 1,535 (70.9)<br>351 (70.1)                           | 1.14, 0.91 to 1.42                                             | <b>.246</b>                                        |
| <b>Age (in years)</b>                                                      | 2,665                    | 52.1 (21.0)                                                     | 50.8 (20.5)                                          | 0.99, 0.98 to 1.00                                             | <b>&lt;.0005</b>                                   |

\*Bold denotes p<.05

Table C – Sources of news about the breast screening story

| <b>Source of information</b>                    | <b>Total (n=1,264)</b> | <b>%</b> | <b>(95% CI)</b> |
|-------------------------------------------------|------------------------|----------|-----------------|
| Television                                      | 971                    | 76.8     | 74.4 to 79.1    |
| Radio                                           | 271                    | 21.4     | 19.2 to 23.8    |
| Print newspaper(s)                              | 169                    | 13.4     | 11.6 to 15.3    |
| Online news websites                            | 134                    | 10.6     | 9.0 to 12.4     |
| Social media websites                           | 68                     | 5.4      | 4.2 to 6.7      |
| Other websites                                  | 11                     | 0.9      | 0.5 to 1.5      |
| Word of mouth                                   | 43                     | 3.4      | 2.5 to 4.5      |
| Other sources                                   | 8                      | 0.6      | 0.3 to 1.2      |
| Discussed or shared the story with someone else | 450                    | 35.6     | 33.0 to 38.3    |

Table D – Full results of the binary logistic regression model testing for an association between awareness of the breast screening media coverage and trust in participants' GPs

| Characteristic                                            | Total<br>(n=1,746) | A lot vs. Not at all; a little; somewhat:<br>n (%) |                         | Adjusted OR, 95% CI<br>(vs. Less than a lot) | p-value               |
|-----------------------------------------------------------|--------------------|----------------------------------------------------|-------------------------|----------------------------------------------|-----------------------|
|                                                           |                    | Less than a lot<br>(n=781; 44.7%)                  | A lot<br>(n=965; 55.3%) |                                              |                       |
| <b>Screening story awareness</b>                          |                    |                                                    |                         |                                              |                       |
| Aware of the main story and both follow-up commentaries   | 238                | 98 (41.2)                                          | 140 (58.8)              | 1.10, 0.74 to 1.64                           | Overall: .729<br>.653 |
| Aware of the main story and overdiagnosis follow-up       | 172                | 66 (38.4)                                          | 106 (61.6)              | 1.31, 0.85 to 2.03                           | .218                  |
| Aware of the main story and all-cause mortality follow-up | 107                | 49 (45.8)                                          | 58 (54.2)               | 1.21, 0.73 to 2.02                           | .459                  |
| Aware of the main story only                              | 655                | 280 (42.7)                                         | 375 (57.3)              | 1.17, 0.88 to 1.57                           | .283                  |
| vs. Unaware of the story                                  | 574                | 288 (50.2)                                         | 286 (49.8)              |                                              |                       |
| <b>Recruitment wave</b>                                   |                    |                                                    |                         |                                              |                       |
| Wave 2: 20-26 <sup>th</sup> June                          | 557                | 255 (45.8)                                         | 663 (55.8)              | 0.81, 0.64 to 1.04                           | .097                  |
| vs. Wave 1: 6-10 <sup>th</sup> June                       | 1,189              | 526 (44.2)                                         | 302 (54.2)              |                                              |                       |
| <b>Gender</b>                                             |                    |                                                    |                         |                                              |                       |
| Male                                                      | 754                | 317 (42.0)                                         | 437 (58.0)              | 1.15, 0.86 to 1.54                           | .334                  |
| vs. Female                                                | 992                | 464 (46.8)                                         | 528 (53.2)              |                                              |                       |
| <b>Ethnicity</b>                                          |                    |                                                    |                         |                                              |                       |
| White British                                             | 1,450              | 614 (42.3)                                         | 836 (57.7)              | 1.17, 0.85 to 1.61                           | .328                  |
| vs. Other groups                                          | 296                | 167 (54.4)                                         | 129 (43.6)              |                                              |                       |
| <b>Marital status</b>                                     |                    |                                                    |                         |                                              |                       |
| Married/Living as a couple                                | 964                | 422 (42.8)                                         | 542 (56.2)              | 1.04, 0.77 to 1.42                           | Overall: .504<br>.782 |
| Widowed/Divorced/Separated                                | 341                | 139 (40.8)                                         | 202 (59.2)              | 0.86, 0.57 to 1.29                           | .460                  |
| vs. Single                                                | 441                | 220 (49.9)                                         | 221 (50.1)              |                                              |                       |
| <b>Highest level of education</b>                         |                    |                                                    |                         |                                              |                       |
| Graduate level/Above                                      | 494                | 230 (46.6)                                         | 264 (53.4)              | 0.64, 0.42 to 0.98                           | Overall: .056<br>.042 |
| A-levels/AS levels/Equivalentents                         | 438                | 201 (45.9)                                         | 237 (54.1)              | 0.70, 0.46 to 1.06                           | .089                  |
| GCSEs/Equivalentents                                      | 429                | 213 (49.7)                                         | 216 (50.3)              | 0.63, 0.43 to 0.94                           | .022                  |
| Trade apprenticeships/Other                               | 86                 | 41 (47.7)                                          | 45 (52.3)               | 0.44, 0.25 to 0.80                           | .007                  |
| vs. No formal qualifications                              | 299                | 96 (32.1)                                          | 203 (67.9)              |                                              |                       |
| <b>Social grade</b>                                       |                    |                                                    |                         |                                              |                       |
| Grade A or B                                              | 317                | 128 (40.4)                                         | 189 (59.6)              | 1.20, 0.82 to 1.76                           | Overall: .711<br>.342 |
| Grade C1                                                  | 505                | 231 (45.7)                                         | 274 (54.3)              | 1.02, 0.74 to 1.39                           | .923                  |
| Grade C2                                                  | 385                | 181 (47.0)                                         | 204 (53.0)              | 0.97, 0.70 to 1.36                           | .874                  |
| vs. Grade D or E                                          | 539                | 241 (44.7)                                         | 298 (55.3)              |                                              |                       |
| <b>Employment status</b>                                  |                    |                                                    |                         |                                              |                       |
| Working                                                   | 806                | 411 (51.0)                                         | 395 (49.0)              | 0.82, 0.63 to 1.07                           | .135                  |
| vs. Not working                                           | 940                | 370 (39.4)                                         | 570 (60.6)              |                                              |                       |
| <b>Area type</b>                                          |                    |                                                    |                         |                                              |                       |
| Urban                                                     | 1,420              | 635 (44.7)                                         | 785 (55.3)              | 1.12, 0.84 to 1.50                           | .430                  |
| vs. Rural                                                 | 326                | 146 (44.8)                                         | 180 (55.2)              |                                              |                       |
| <b>Personal diagnosis of cancer</b>                       |                    |                                                    |                         |                                              |                       |
| Yes                                                       | 1,599              | 718 (44.9)                                         | 881 (55.1)              | 0.84, 0.55 to 1.28                           | .404                  |
| vs. No                                                    | 147                | 63 (42.9)                                          | 84 (57.1)               |                                              |                       |
| <b>Personal experience of breast screening</b>            |                    |                                                    |                         |                                              |                       |
| Taken part                                                | 411                | 159 (38.7)                                         | 252 (61.3)              | 1.33, 0.91 to 1.95                           | Overall: .284<br>.145 |
| Invited, never taken part                                 | 48                 | 21 (43.8)                                          | 27 (56.3)               | 0.95, 0.46 to 1.98                           | .894                  |
| vs. Not eligible or not invited                           | 1,287              | 601 (46.7)                                         | 686 (53.3)              |                                              |                       |
| <b>Belief that screening is almost always a good idea</b> |                    |                                                    |                         |                                              |                       |
| Yes                                                       | 1,609              | 701 (43.6)                                         | 908 (56.4)              | 1.30, 0.85 to 1.97                           | .230                  |
| vs. No or not sure                                        | 137                | 80 (58.4)                                          | 57 (41.6)               |                                              |                       |
| <b>Awareness of volcano news</b>                          |                    |                                                    |                         |                                              |                       |
| Yes                                                       | 1,332              | 565 (42.4)                                         | 767 (57.6)              | 1.04, 0.77 to 1.40                           | .789                  |
| vs. No or not sure                                        | 414                | 216 (52.2)                                         | 198 (47.8)              |                                              |                       |

|                                          |       |             |             |                      |                   |
|------------------------------------------|-------|-------------|-------------|----------------------|-------------------|
| <b>Awareness of election news</b>        |       |             |             |                      |                   |
| Yes                                      | 1,114 | 467 (41.9)  | 647 (58.1)  | 1.19, 0.93 to 1.54   | .172              |
| vs. No or not sure                       | 632   | 314 (49.7)  | 318 (50.3)  |                      |                   |
| <b>General level of trust in the NHS</b> |       |             |             |                      |                   |
| A lot                                    | 943   | 202 (21.4)  | 741 (78.6)  | 13.53, 6.65 to 27.54 | <b>&lt;.0005*</b> |
| Somewhat                                 | 589   | 409 (69.4)  | 180 (30.6)  | 1.62, 0.80 to 3.31   | .183              |
| A little                                 | 163   | 130 (79.8)  | 33 (20.2)   | 1.00, 0.46 to 2.21   | .994              |
| vs. Not at all                           | 51    | 40 (78.4)   | 11 (21.6)   |                      |                   |
| <b>Age (in years)</b>                    | 1,746 | 46.9 (19.1) | 53.9 (21.0) | 1.01, 1.00 to 1.02   | .087              |

\*Bold denotes  $p < .05$

Table E – Full results of the binary logistic regression model testing for an association between awareness of the breast screening media coverage and trust in the NHS

| Characteristic                                            | Total<br>(n=1,746) | A lot vs. Not at all; a little; somewhat:<br>n (%) |                         | Adjusted OR, 95% CI<br>(vs. Less than a lot) | p-value               |
|-----------------------------------------------------------|--------------------|----------------------------------------------------|-------------------------|----------------------------------------------|-----------------------|
|                                                           |                    | Less than a lot<br>(n=803; 46.0%)                  | A lot<br>(n=943; 54.0%) |                                              |                       |
| <b>Screening story awareness</b>                          |                    |                                                    |                         |                                              |                       |
| Aware of the main story and both follow-up commentaries   | 238                | 102 (42.9)                                         | 136 (57.1)              | 0.87, 0.59 to 1.30                           | Overall: .290<br>.503 |
| Aware of the main story and overdiagnosis follow-up       | 172                | 76 (44.2)                                          | 96 (55.8)               | 0.78, 0.51 to 1.21                           | .267                  |
| Aware of the main story and all-cause mortality follow-up | 107                | 57 (53.3)                                          | 50 (46.7)               | 0.58, 0.35 to 0.97                           | .039                  |
| Aware of the main story only                              | 655                | 299 (45.6)                                         | 356 (54.4)              | 0.81, 0.60 to 1.09                           | .160                  |
| vs. Unaware of the story                                  | 574                | 269 (46.9)                                         | 305 (53.1)              |                                              |                       |
| <b>Recruitment wave</b>                                   |                    |                                                    |                         |                                              |                       |
| Wave 2: 20-26 <sup>th</sup> June                          | 557                | 248 (44.5)                                         | 309 (55.5)              | 1.21, 0.95 to 1.55                           | .118                  |
| vs. Wave 1: 6-10 <sup>th</sup> June                       | 1,189              | 555 (46.7)                                         | 634 (53.3)              |                                              |                       |
| <b>Age</b>                                                |                    |                                                    |                         |                                              |                       |
| 65+                                                       | 530                | 198 (37.4)                                         | 332 (62.6)              | 1.04, 0.61 to 1.79                           | Overall: .052<br>.880 |
| 55-64                                                     | 245                | 111 (45.3)                                         | 134 (54.7)              | 0.76, 0.44 to 1.30                           | .309                  |
| 45-54                                                     | 235                | 115 (48.9)                                         | 120 (51.1)              | 0.83, 0.50 to 1.39                           | .484                  |
| 35-44                                                     | 245                | 135 (55.1)                                         | 110 (44.9)              | 0.59, 0.36 to 0.96                           | .035                  |
| 25-34                                                     | 265                | 152 (57.4)                                         | 113 (42.6)              | 0.56, 0.35 to 0.91                           | .018                  |
| vs. 16-24                                                 | 226                | 92 (40.7)                                          | 134 (59.3)              |                                              |                       |
| <b>Gender</b>                                             |                    |                                                    |                         |                                              |                       |
| Male                                                      | 754                | 319 (42.3)                                         | 435 (57.7)              | 0.99, 0.73 to 1.33                           | .985                  |
| vs. Female                                                | 992                | 484 (48.8)                                         | 508 (51.2)              |                                              |                       |
| <b>Ethnicity</b>                                          |                    |                                                    |                         |                                              |                       |
| White British                                             | 1,450              | 634 (43.7)                                         | 816 (56.3)              | 1.47, 1.07 to 2.02                           | <b>.019*</b>          |
| vs. Other groups                                          | 296                | 169 (57.1)                                         | 127 (42.9)              |                                              |                       |
| <b>Marital status</b>                                     |                    |                                                    |                         |                                              |                       |
| Married/Living as a couple                                | 964                | 440 (45.6)                                         | 524 (54.4)              | 1.07, 0.78 to 1.47                           | Overall: .870<br>.685 |
| Widowed/Divorced/Separated                                | 341                | 151 (44.3)                                         | 190 (55.7)              | 1.00, 0.66 to 1.50                           | .990                  |
| vs. Single                                                | 441                | 212 (48.1)                                         | 229 (51.9)              |                                              |                       |
| <b>Highest level of education</b>                         |                    |                                                    |                         |                                              |                       |
| Graduate level/Above                                      | 494                | 233 (47.2)                                         | 261 (52.8)              | 1.20, 0.79 to 1.83                           | Overall: .076<br>.386 |
| A-levels/AS levels/Equivalent                             | 438                | 199 (45.4)                                         | 239 (54.6)              | 1.12, 0.75 to 1.67                           | .582                  |
| GCSEs/Equivalent                                          | 429                | 224 (52.2)                                         | 205 (47.8)              | 0.86, 0.59 to 1.26                           | .447                  |
| Trade apprenticeships/Other                               | 86                 | 32 (37.2)                                          | 54 (62.8)               | 1.85, 1.01 to 3.39                           | .047                  |
| vs. No formal qualifications                              | 299                | 115 (38.5)                                         | 184 (61.5)              |                                              |                       |
| <b>Social grade</b>                                       |                    |                                                    |                         |                                              |                       |
| Grade A or B                                              | 317                | 140 (44.2)                                         | 177 (55.8)              | 0.96, 0.65 to 1.41                           | Overall: .990<br>.828 |
| Grade C1                                                  | 505                | 232 (45.9)                                         | 273 (54.1)              | 0.99, 0.72 to 1.37                           | .968                  |
| Grade C2                                                  | 385                | 179 (46.5)                                         | 206 (53.5)              | 1.02, 0.73 to 1.43                           | .892                  |
| vs. Grade D or E                                          | 539                | 252 (46.8)                                         | 287 (53.2)              |                                              |                       |
| <b>Employment status</b>                                  |                    |                                                    |                         |                                              |                       |
| Working                                                   | 806                | 410 (50.9)                                         | 396 (49.1)              | 0.94, 0.71 to 1.25                           | .673                  |
| vs. Not working                                           | 940                | 393 (41.8)                                         | 547 (58.2)              |                                              |                       |
| <b>Area type</b>                                          |                    |                                                    |                         |                                              |                       |
| Urban                                                     | 1,420              | 656 (46.2)                                         | 764 (53.8)              | 0.96, 0.72 to 1.29                           | .795                  |
| vs. Rural                                                 | 326                | 147 (45.1)                                         | 179 (54.9)              |                                              |                       |
| <b>Personal diagnosis of cancer</b>                       |                    |                                                    |                         |                                              |                       |
| Yes                                                       | 1,599              | 737 (46.1)                                         | 862 (53.9)              | 1.00, 0.66 to 1.50                           | .994                  |
| vs. No                                                    | 147                | 66 (44.9)                                          | 81 (55.1)               |                                              |                       |
| <b>Personal experience of breast screening</b>            |                    |                                                    |                         |                                              |                       |
| Taken part                                                | 411                | 193 (47.0)                                         | 218 (53.0)              | 0.65, 0.43 to 0.97                           | Overall: .062<br>.035 |
| Invited, never taken part                                 | 48                 | 20 (41.7)                                          | 28 (58.3)               | 1.10, 0.51 to 2.35                           | .813                  |
| vs. Not eligible or not invited                           | 1,287              | 590 (45.8)                                         | 697 (54.2)              |                                              |                       |

|                                                           |       |            |            |                      |                  |
|-----------------------------------------------------------|-------|------------|------------|----------------------|------------------|
| <b>Belief that screening is almost always a good idea</b> |       |            |            |                      |                  |
| Yes                                                       | 1,609 | 715 (44.4) | 894 (55.6) | 1.96, 1.28 to 3.00   | <b>.002</b>      |
| vs. No or not sure                                        | 137   | 88 (64.2)  | 49 (35.8)  |                      |                  |
| <b>Awareness of volcano news</b>                          |       |            |            |                      |                  |
| Yes                                                       | 1,332 | 594 (44.6) | 738 (55.4) | 1.00, 0.74 to 1.35   | .987             |
| vs. No or not sure                                        | 414   | 209 (50.5) | 205 (49.5) |                      |                  |
| <b>Awareness of election news</b>                         |       |            |            |                      |                  |
| Yes                                                       | 1,114 | 491 (44.1) | 623 (55.9) | 1.03, 0.80 1.33      | .817             |
| vs. No or not sure                                        | 632   | 312 (49.4) | 320 (50.6) |                      |                  |
| <b>General level of trust in participants' GPs</b>        |       |            |            | Overall: <.0005      |                  |
| A lot                                                     | 965   | 224 (23.2) | 741 (76.8) | 11.98, 6.07 to 23.64 | <b>&lt;.0005</b> |
| Somewhat                                                  | 513   | 370 (72.1) | 143 (27.9) | 1.39, 0.70 to 2.76   | .350             |
| A little                                                  | 212   | 165 (77.8) | 47 (22.2)  | 1.12, 0.54 to 2.33   | .770             |
| vs. Not at all                                            | 56    | 44 (78.6)  | 12 (21.4)  |                      |                  |

\*Bold denotes p<.05

Table F – Full results of the binary logistic regression model testing for an association between awareness of the breast screening media coverage and frequency of worry about breast cancer

|                                                                                                                                          |                               | Never; occasionally vs. Sometimes; often; very often:<br>n (%) / M (SD) |                                                              | Adjusted OR, 95% CI                                                                  | p-value                                    |
|------------------------------------------------------------------------------------------------------------------------------------------|-------------------------------|-------------------------------------------------------------------------|--------------------------------------------------------------|--------------------------------------------------------------------------------------|--------------------------------------------|
| Characteristic                                                                                                                           | Total<br>(n=700)              | Never;<br>occasionally<br>(n=441; 63.0%)                                | Sometimes;<br>often; very often<br>(n=259; 37.0%)            | Sometimes; often; very often<br>(vs. Never; occasionally)                            |                                            |
| <b>Screening story awareness</b>                                                                                                         |                               |                                                                         |                                                              |                                                                                      | Overall: .198                              |
| Aware of the main story and both follow-up commentaries                                                                                  | 88                            | 65 (73.9)                                                               | 23 (26.1)                                                    | 0.85, 0.46 to 1.58                                                                   | .614                                       |
| Aware of the main story and overdiagnosis follow-up                                                                                      | 63                            | 42 (66.7)                                                               | 21 (33.3)                                                    | 1.05, 0.55 to 2.01                                                                   | .878                                       |
| Aware of the main story and all-cause mortality follow-up                                                                                | 36                            | 25 (69.4)                                                               | 11 (30.6)                                                    | 1.10, 0.49 to 2.49                                                                   | .819                                       |
| Aware of the main story only vs. Unaware of the story                                                                                    | 270<br>243                    | 153 (56.7)<br>156 (64.2)                                                | 117 (43.3)<br>87 (35.8)                                      | 1.49, 0.98 to 2.25                                                                   | .062                                       |
| <b>Recruitment wave</b>                                                                                                                  |                               |                                                                         |                                                              |                                                                                      |                                            |
| Wave 2: 20-26 <sup>th</sup> June vs. Wave 1: 6-10 <sup>th</sup> June                                                                     | 229<br>471                    | 152 (66.4)<br>289 (61.4)                                                | 77 (33.6)<br>182 (38.6)                                      | 0.83, 0.58 to 1.19                                                                   | .304                                       |
| <b>Ethnicity</b>                                                                                                                         |                               |                                                                         |                                                              |                                                                                      |                                            |
| White British vs. Other groups                                                                                                           | 563<br>137                    | 354 (62.9)<br>87 (63.5)                                                 | 209 (37.1)<br>50 (36.5)                                      | 0.90, 0.58 to 1.39                                                                   | .635                                       |
| <b>Marital status</b>                                                                                                                    |                               |                                                                         |                                                              |                                                                                      | Overall: .272                              |
| Married/Living as a couple vs. Widowed/Divorced/Separated vs. Single                                                                     | 403<br>100<br>197             | 255 (63.3)<br>58 (58.0)<br>128 (65.0)                                   | 148 (36.7)<br>42 (42.0)<br>69 (35.0)                         | 1.14, 0.76 to 1.72<br>1.61, 0.90 to 2.87                                             | .519<br>.110                               |
| <b>Highest level of education</b>                                                                                                        |                               |                                                                         |                                                              |                                                                                      | Overall: <b>.026*</b>                      |
| Graduate level/Above vs. A-levels/AS levels/Equivalent vs. GCSEs/Equivalent vs. Trade apprenticeships/Other vs. No formal qualifications | 230<br>206<br>176<br>17<br>71 | 149 (64.8)<br>138 (67.0)<br>105 (59.7)<br>12 (70.6)<br>37 (52.1)        | 81 (35.2)<br>68 (33.0)<br>71 (40.3)<br>5 (29.4)<br>34 (47.9) | 0.40, 0.21 to 0.79<br>0.67, 0.19 to 0.70<br>0.57, 0.31 to 1.04<br>0.33, 0.10 to 1.10 | <b>.008</b><br><b>.002</b><br>.068<br>.072 |
| <b>Social grade</b>                                                                                                                      |                               |                                                                         |                                                              |                                                                                      | Overall: .704                              |
| Grade A or B vs. Grade C1 vs. Grade C2 vs. Grade D or E                                                                                  | 125<br>209<br>165<br>201      | 84 (67.2)<br>123 (58.9)<br>105 (63.6)<br>129 (64.2)                     | 41 (32.8)<br>86 (41.1)<br>60 (36.4)<br>72 (35.8)             | 1.07, 0.60 to 1.90<br>1.31, 0.80 to 2.13<br>1.11, 0.67 to 1.83                       | .819<br>.282<br>.691                       |
| <b>Employment status</b>                                                                                                                 |                               |                                                                         |                                                              |                                                                                      |                                            |
| Working vs. Not working                                                                                                                  | 392<br>308                    | 239 (61.0)<br>202 (65.6)                                                | 153 (39.0)<br>106 (34.4)                                     | 1.15, 0.81 to 1.64                                                                   | .435                                       |
| <b>Area type</b>                                                                                                                         |                               |                                                                         |                                                              |                                                                                      |                                            |
| Urban vs. Rural                                                                                                                          | 574<br>126                    | 366 (63.8)<br>75 (59.5)                                                 | 208 (36.2)<br>51 (40.5)                                      | 0.83, 0.54 to 1.26                                                                   | .378                                       |
| <b>Personal diagnosis of cancer</b>                                                                                                      |                               |                                                                         |                                                              |                                                                                      |                                            |
| Yes vs. No                                                                                                                               | 44<br>656                     | 26 (59.1)<br>415 (63.3)                                                 | 18 (40.9)<br>241 (36.7)                                      | 1.62, 0.82 to 3.22                                                                   | .169                                       |
| <b>Personal experience of breast screening</b>                                                                                           |                               |                                                                         |                                                              |                                                                                      | Overall: .428                              |
| Taken part vs. Invited, never taken part vs. Not eligible or not invited                                                                 | 221<br>34<br>445              | 151 (68.3)<br>23 (67.6)<br>267 (60.0)                                   | 70 (31.7)<br>11 (32.4)<br>178 (40.0)                         | 0.66, 0.36 to 1.23<br>0.75, 0.30 to 1.89                                             | .193<br>.537                               |
| <b>Belief that screening is almost always a good idea</b>                                                                                |                               |                                                                         |                                                              |                                                                                      |                                            |
| Yes vs. No or not sure                                                                                                                   | 660<br>40                     | 412 (62.4)<br>29 (72.5)                                                 | 248 (37.6)<br>11 (27.5)                                      | 1.12, 0.50 to 2.51                                                                   | .779                                       |
| <b>Awareness of volcano news</b>                                                                                                         |                               |                                                                         |                                                              |                                                                                      |                                            |
| Yes vs. No or not sure                                                                                                                   | 505<br>195                    | 323 (64.0)<br>118 (60.5)                                                | 182 (36.0)<br>77 (39.5)                                      | 0.91, 0.61 to 1.36                                                                   | .645                                       |
| <b>Awareness of election news</b>                                                                                                        |                               |                                                                         |                                                              |                                                                                      |                                            |
| Yes                                                                                                                                      | 424                           | 275 (64.9)                                                              | 149 (35.1)                                                   | 0.84, 0.59 to 1.20                                                                   | .340                                       |

|                                                        |     |             |             |                    |               |
|--------------------------------------------------------|-----|-------------|-------------|--------------------|---------------|
| vs. No or not sure                                     | 276 | 166 (60.1)  | 110 (39.9)  |                    |               |
| <b>General level of trust in participants' GPs</b>     |     |             |             |                    | Overall: .791 |
| A lot                                                  | 339 | 220 (64.9)  | 119 (35.1)  | 1.26, 0.50 to 3.15 | .626          |
| Somewhat                                               | 221 | 131 (59.3)  | 90 (40.7)   | 1.47, 0.58 to 3.72 | .412          |
| A little                                               | 109 | 69 (63.3)   | 40 (36.7)   | 1.25, 0.49 to 3.22 | .641          |
| vs. Not at all                                         | 31  | 21 (67.7)   | 10 (32.3)   |                    |               |
| <b>General level of trust in the NHS</b>               |     |             |             |                    | Overall: .744 |
| A lot                                                  | 344 | 223 (64.8)  | 121 (35.2)  | 1.14, 0.41 to 3.21 | .802          |
| Somewhat                                               | 257 | 151 (58.8)  | 106 (41.2)  | 1.39, 0.49 to 3.91 | .535          |
| A little                                               | 76  | 51 (67.1)   | 25 (32.9)   | 1.13, 0.38 to 3.36 | .833          |
| vs. Not at all                                         | 23  | 16 (69.6)   | 7 (30.4)    |                    |               |
| <b>Breast screening intentions for next invitation</b> |     |             |             |                    | Overall: .163 |
| Yes, definitely                                        | 601 | 369 (61.4)  | 232 (38.6)  | 1.48, 0.47 to 4.68 | .503          |
| Yes, probably                                          | 70  | 49 (70.0)   | 21 (30.0)   | 0.93, 0.27 to 3.25 | .913          |
| No, probably not                                       | 13  | 12 (92.3)   | 1 (7.7)     | 0.25, 0.02 to 2.70 | .254          |
| vs. No, definitely not                                 | 16  | 11 (68.8)   | 5 (31.3)    |                    |               |
| <b>Age (in years)</b>                                  | 700 | 43.7 (15.5) | 41.8 (14.3) | 0.99, 0.97 to 1.01 | .463          |

\*Bold denotes  $p < .05$

Table G – Full results of the binary logistic regression model testing for an association between awareness of the breast screening media coverage and breast screening intentions

| Characteristic                                            | Total<br>(n=700) | Yes, definitely vs. Yes, probably; no, probably not; no, definitely not: n (%) |                                      | Adjusted OR, 95% CI                | p-value               |
|-----------------------------------------------------------|------------------|--------------------------------------------------------------------------------|--------------------------------------|------------------------------------|-----------------------|
|                                                           |                  | No definite intention<br>(n=99; 14.1%)                                         | Definite intention<br>(n=601; 85.9%) |                                    |                       |
|                                                           |                  |                                                                                |                                      | <b>Definite intention</b>          |                       |
|                                                           |                  |                                                                                |                                      | <b>(vs. No definite intention)</b> |                       |
| <b>Screening story awareness</b>                          |                  |                                                                                |                                      |                                    | Overall: .108         |
| Aware of the main story and both follow-up commentaries   | 88               | 10 (11.4)                                                                      | 78 (88.6)                            | 2.01, 0.74 to 5.48                 | .172                  |
| Aware of the main story and overdiagnosis follow-up       | 63               | 4 (4.3)                                                                        | 59 (93.7)                            | 2.66, 0.79 to 8.89                 | .113                  |
| Aware of the main story and all-cause mortality follow-up | 36               | 6 (16.7)                                                                       | 30 (83.3)                            | 0.66, 0.20 to 2.13                 | .486                  |
| Aware of the main story only                              | 270              | 22 (8.1)                                                                       | 248 (91.9)                           | 1.88, 0.99 to 3.57                 | .054                  |
| vs. Unaware of the story                                  | 243              | 57 (23.5)                                                                      | 186 (76.5)                           |                                    |                       |
| <b>Recruitment wave</b>                                   |                  |                                                                                |                                      |                                    |                       |
| Wave 2: 20-26 <sup>th</sup> June                          | 229              | 40 (17.5)                                                                      | 189 (82.5)                           | 0.71, 0.42 to 1.21                 | .211                  |
| vs. Wave 1: 6-10 <sup>th</sup> June                       | 471              | 59 (12.5)                                                                      | 412 (87.5)                           |                                    |                       |
| <b>Age</b>                                                |                  |                                                                                |                                      |                                    | Overall: .050         |
| 65+                                                       | 69               | 7 (10.1)                                                                       | 62 (89.9)                            | 0.84, 0.13 to 5.37                 | .855                  |
| 55-64                                                     | 123              | 5 (4.1)                                                                        | 118 (95.9)                           | 2.49, 0.42 to 14.74                | .313                  |
| 45-54                                                     | 128              | 10 (7.8)                                                                       | 118 (92.2)                           | 3.59, 1.10 to 11.69                | .034                  |
| 35-44                                                     | 143              | 21 (14.7)                                                                      | 122 (85.3)                           | 2.72, 1.16 to 6.41                 | .022                  |
| 25-34                                                     | 144              | 29 (20.1)                                                                      | 115 (79.9)                           | 2.82, 1.24 to 6.42                 | .014                  |
| vs. 16-24                                                 | 93               | 27 (29.0)                                                                      | 66 (71.0)                            |                                    |                       |
| <b>Ethnicity</b>                                          |                  |                                                                                |                                      |                                    |                       |
| White British                                             | 563              | 72 (12.8)                                                                      | 491 (87.2)                           | 0.96, 0.51 to 1.83                 | .905                  |
| vs. Other groups                                          | 137              | 27 (19.7)                                                                      | 110 (80.3)                           |                                    |                       |
| <b>Marital status</b>                                     |                  |                                                                                |                                      |                                    | Overall: .321         |
| Married/Living as a couple                                | 403              | 49 (12.2)                                                                      | 354 (87.8)                           | 0.99, 0.53 to 1.84                 | .970                  |
| Widowed/Divorced/Separated                                | 100              | 6 (6.0)                                                                        | 94 (94.0)                            | 2.18, 0.73 to 6.53                 | .163                  |
| vs. Single                                                | 197              | 44 (22.3)                                                                      | 153 (77.7)                           |                                    |                       |
| <b>Highest level of education</b>                         |                  |                                                                                |                                      |                                    | Overall: .169         |
| Graduate level/Above                                      | 230              | 35 (15.2)                                                                      | 195 (84.8)                           | 0.69, 0.22 to 2.20                 | .533                  |
| A-levels/AS levels/Equivalent                             | 206              | 35 (17.0)                                                                      | 171 (83.0)                           | 0.87, 0.29 to 2.62                 | .808                  |
| GCSEs/Equivalent                                          | 176              | 19 (10.8)                                                                      | 157 (89.2)                           | 1.92, 0.62 to 5.92                 | .259                  |
| Trade apprenticeships/Other                               | 17               | 3 (17.6)                                                                       | 14 (82.4)                            | 1.38, 0.24 to 0.81                 | .720                  |
| vs. No formal qualifications                              | 71               | 7 (9.9)                                                                        | 64 (90.1)                            |                                    |                       |
| <b>Social grade</b>                                       |                  |                                                                                |                                      |                                    | Overall: .186         |
| Grade A or B                                              | 125              | 14 (11.2)                                                                      | 111 (88.8)                           | 1.87, 0.76 to 4.61                 | .177                  |
| Grade C1                                                  | 209              | 25 (12.0)                                                                      | 184 (88.0)                           | 2.36, 1.08 to 5.16                 | .032                  |
| Grade C2                                                  | 165              | 24 (14.5)                                                                      | 141 (85.5)                           | 1.85, 0.86 to 3.98                 | .118                  |
| vs. Grade D or E                                          | 201              | 36 (17.9)                                                                      | 165 (82.1)                           |                                    |                       |
| <b>Employment status</b>                                  |                  |                                                                                |                                      |                                    |                       |
| Working                                                   | 392              | 56 (14.3)                                                                      | 336 (85.7)                           | 0.70, 0.39 to 1.26                 | .238                  |
| vs. Not working                                           | 308              | 43 (14.0)                                                                      | 265 (86.0)                           |                                    |                       |
| <b>Area type</b>                                          |                  |                                                                                |                                      |                                    |                       |
| Urban                                                     | 574              | 83 (14.5)                                                                      | 491 (85.5)                           | 0.79, 0.39 to 1.59                 | .512                  |
| vs. Rural                                                 | 126              | 16 (12.7)                                                                      | 110 (87.3)                           |                                    |                       |
| <b>Personal diagnosis of cancer</b>                       |                  |                                                                                |                                      |                                    |                       |
| Yes                                                       | 44               | 7 (15.9)                                                                       | 37 (84.1)                            | 0.94, 0.30 to 2.98                 | .918                  |
| vs. No                                                    | 656              | 92 (14.0)                                                                      | 564 (86.0)                           |                                    |                       |
| <b>Personal experience of breast screening</b>            |                  |                                                                                |                                      |                                    | Overall: <b>.013*</b> |
| Taken part                                                | 221              | 9 (4.1)                                                                        | 212 (95.9)                           | 6.12, 1.37 to 27.33                | <b>.018</b>           |
| Invited, never taken part                                 | 34               | 6 (17.6)                                                                       | 28 (82.4)                            | 0.99, 0.21 to 4.61                 | .986                  |
| vs. Not eligible or not invited                           | 445              | 84 (18.9)                                                                      | 361 (81.1)                           |                                    |                       |
| <b>Belief that screening is almost always a good idea</b> |                  |                                                                                |                                      |                                    |                       |

|                                                    |     |           |            |                     |                      |
|----------------------------------------------------|-----|-----------|------------|---------------------|----------------------|
| Yes                                                | 660 | 81 (12.3) | 579 (87.7) | 9.08, 3.77 to 21.88 | <b>&lt;.0005</b>     |
| vs. No or not sure                                 | 40  | 18 (45.0) | 22 (55.0)  |                     |                      |
| <b>Awareness of volcano news</b>                   |     |           |            |                     |                      |
| Yes                                                | 505 | 54 (10.7) | 451 (89.3) | 1.34, 0.74 to 2.41  | .335                 |
| vs. No or not sure                                 | 195 | 45 (23.1) | 150 (76.9) |                     |                      |
| <b>Awareness of election news</b>                  |     |           |            |                     |                      |
| Yes                                                | 424 | 47 (11.1) | 377 (88.9) | 1.42, 0.82 to 2.46  | .208                 |
| vs. No or not sure                                 | 276 | 52 (18.8) | 224 (81.2) |                     |                      |
| <b>General level of trust in participants' GPs</b> |     |           |            |                     | Overall: .025        |
| A lot                                              | 339 | 31 (9.1)  | 308 (90.9) | 1.55, 0.45 to 5.29  | .487                 |
| Somewhat                                           | 221 | 44 (19.9) | 177 (80.1) | 0.76, 0.23 to 5.67  | .663                 |
| A little                                           | 109 | 16 (14.7) | 93 (85.3)  | 2.48, 0.69 to 8.90  | .163                 |
| vs. Not at all                                     | 31  | 8 (25.8)  | 23 (74.2)  |                     |                      |
| <b>General level of trust in the NHS</b>           |     |           |            |                     | Overall: .007        |
| A lot                                              | 344 | 34 (9.9)  | 310 (90.1) | 1.16, 0.29 to 4.64  | .832                 |
| Somewhat                                           | 257 | 42 (16.3) | 215 (83.7) | 0.70, 0.18 to 2.79  | .614                 |
| A little                                           | 76  | 18 (23.7) | 58 (76.3)  | 0.27, 0.06 to 1.11  | .068                 |
| vs. Not at all                                     | 23  | 5 (21.7)  | 18 (78.3)  |                     |                      |
| <b>Frequency of worry about breast cancer</b>      |     |           |            |                     | Overall: <b>.028</b> |
| Very often                                         | 39  | 3 (7.7)   | 36 (92.3)  | 3.00, 0.72 to 12.51 | .132                 |
| Often                                              | 43  | 5 (9.3)   | 39 (90.7)  | 2.95, 0.85 to 10.26 | .089                 |
| Sometimes                                          | 177 | 20 (11.3) | 157 (88.7) | 2.59, 1.31 to 5.15  | <b>.006</b>          |
| Occasionally                                       | 231 | 27 (11.7) | 204 (88.3) | 2.15, 1.15 to 4.02  | <b>.016</b>          |
| vs. Never                                          | 210 | 45 (21.4) | 165 (78.6) |                     |                      |

\*Bold denotes  $p < .05$

Table H – Number of participants with missing data for each variable of interest

| Measure                                            | Total (n=1,894) |
|----------------------------------------------------|-----------------|
| Awareness of the news about breast screening       | 0               |
| Recruitment wave                                   | 0               |
| Gender                                             | 0               |
| Ethnicity                                          | 8               |
| Marital status                                     | 0               |
| Highest level of education                         | 17              |
| Social grade                                       | 0               |
| Employment status                                  | 0               |
| Area type                                          | 0               |
| Personal diagnosis of cancer                       | 33              |
| Personal experience of breast screening            | 33              |
| Belief that screening is almost always a good idea | 0               |
| Awareness of the news about the volcanic eruption  | 0               |
| Awareness of the news about the local elections    | 0               |
| General level of trust in participants' GPs        | 67              |
| General level of trust in the NHS                  | 19              |
| Frequency of worry about breast cancer             | 22              |
| Breast screening intentions for next invitation    | 9               |
